1        **A fronto-temporo-parietal network disambiguates potential objects of joint attention**

2

3        P. M. Kraemer<sup>1, 5†</sup>, M. Görner<sup>1, 2, 3, †</sup>, H. Ramezani<sup>1, 2, 3, †</sup>, P. W. Dicke<sup>1</sup> and P. Thier<sup>1, 4, \*</sup>

4        <sup>1</sup>Department of Cognitive Neurology, Hertie Institute for Clinical Brain Research, University of  
5        Tübingen, 72076 Tübingen, Germany.

6        <sup>2</sup>Graduate School of Neural and Behavioural Sciences, University of Tübingen, 72074 Tübingen,  
7        Germany.

8        <sup>3</sup>International Max Planck Research School for Cognitive and Systems Neuroscience, University  
9        of Tübingen, 72074 Tübingen, Germany.

10       <sup>4</sup>Werner Reichardt Centre for Integrative Neuroscience, University of Tübingen, 72076 Tübingen,  
11       Germany.

12       <sup>5</sup>Center for Decision Neuroscience, Faculty of Psychology, University of Basel, 4055 Basel,  
13       Switzerland.

14

15       † These authors contributed equally to this work.

16       \* Correspondence to: Peter Thier, Department of Cognitive Neurology, Hertie Institute for Clinical  
17       Brain Research, Hoppe-Seyler-Str. 3, 72076 Tübingen, Germany. E-mail: [thier@uni-Tuebingen.de](mailto:thier@uni-Tuebingen.de).

18

19

20 **Abstract**

21

22 We use the other's gaze direction to identify her/his object of interest and to shift our attention to  
23 the same object, i.e. to establish joint attention. However, gaze direction may not be sufficient to  
24 unambiguously identify the object of interest as the other's gaze may hit more than one object. In  
25 this case, the observer must use *a priori* information to disambiguate the object choice. Using  
26 fMRI, we suggest that the disambiguation is based on a 3-component network. A first component,  
27 the well-known 'gaze following patch' in the posterior STS is activated by gaze following per se.  
28 BOLD activity here is determined exclusively by the usage of gaze direction and is independent of  
29 the need to disambiguate the relevant object. On the other hand, BOLD activity revealing *a priori*  
30 information for the disambiguation and starting early enough to this end is confined to a patch of  
31 cortex at the inferior frontal junction. Finally, BOLD activity reflecting the convergence of both, a  
32 priori information and gaze direction, needed to shift attention to a particular object location is  
33 confined to the posterior parietal cortex.

34

35

36

37

38

39

40

## 41 **Introduction**

42 We follow the gaze of others to objects of her/his attention and to shift our attention to the same  
43 object, thereby establishing joint attention. By associating our object-related intentions,  
44 expectations and desires with the other one, joint attention allows us to develop a *Theory of* (the  
45 other's) *Mind* (TOM). Disposing of a viable TOM is a major basis of successful social interactions  
46 <sup>1,2</sup> and arguably its absence is at the core of devastating neuropsychiatric diseases such as autism.  
47 Human gaze following is geometric<sup>3,4</sup>. This means that we use the other's gaze vector to identify  
48 the exact location of the object of interest. The features of the human eye such as the high contrast  
49 between the white sclera and dark iris allow us to determine the other's eye direction at high  
50 resolution<sup>5,6</sup>. However, knowledge of direction is not sufficient to pinpoint an object in 3D. In  
51 principle, differences between the directions of the two eyes, i.e. knowledge of the vergence angle,  
52 could be exploited to this end. Yet, this will work only for objects close to the beholder as the angle  
53 will become imperceptibly small if the objects are outside the confines of peripersonal space. On  
54 the other hand, gaze following remains precise also for objects quite far from the other although  
55 the gaze vector will in many cases hit more than one object<sup>4</sup>. Hence, how can these objects be  
56 disambiguated? We hypothesized that singling out the relevant object is a consequence of recourse  
57 to prior information on the objects and their potential value for the other. For instance, let us assume  
58 that the day is hot and that the other's appearance may suggest thirst and the desire to take a sip of  
59 something cool. If her/his gaze hit a cool beverage within a set of other objects of little relevance  
60 for a thirsty person, the observer might safely infer that the beverage is the object of desire. In this  
61 example, gaze following is dependent on prior assumptions about the value of objects for the other.  
62 Of course, also the value the object may have for the observer matters. For instance, Liuzza et al.  
63 showed that an observer's appetite to follow the other's gaze to portraits of political leaders is

64 modulated by the degree of political closeness<sup>7</sup>. If the politician attended by the other was a political  
65 opponent of the observer, the willingness to follow gaze was significantly reduced. Also knowing  
66 that gaze following may be inadequate in a given situation and that the other may become aware  
67 of an inadequate behavior will suppress it<sup>8,9</sup>. However, only assumptions about the object value for  
68 the other will help to disambiguate the scene.

69 Following the gaze of others to a particular object is accompanied by a selective BOLD signal in  
70 an island of cortex in the posterior superior temporal sulcus (pSTS), the “gaze-following patch  
71 (GFP)”<sup>10-12</sup>. In these studies, the target object could be identified unambiguously by gaze direction  
72 as for a given gaze direction the vector hit one object only. Hence, it remained unclear if the GFP  
73 helps to integrate the information needed to disambiguate the object choice in case the gaze vector  
74 hits more than one object. In order to address this question, we carried out an fMRI study in which  
75 the selection of the object of joint attention required that the observer recoured on another source  
76 of information aside from the gaze cue.

## 77 **Results**

78 **Behavioral Performance.** Our subjects participated in two fMRI experiments. The first one was a  
79 localizer task that allowed us to identify two *a priori* defined regions of interest (ROI), the GFP  
80 and parietal area hLIP (human LIP). To identify the GFP in the temporal lobe, we compared the  
81 BOLD activity evoked by following the gaze of a human avatar to one out of 4 possible target  
82 objects (*gaze following*, *gf*) with the activity evoked by using to avatar's eye color to overtly shift  
83 attention to the target sharing this color (*color mapping*, *cm*). A significant *gf* > *cm* contrast  
84 delineated a region in the pSTS that matched the coordinates of the *GFP* as known from previous  
85 studies<sup>11,12</sup>. Area hLIP was localized by a significant *cm* > *bl* (baseline) contrast in the parietal  
86 lobe. The identified region matched values given elsewhere as well<sup>13</sup>. The second experiment was  
87 a gaze following task, in which the subjects saw a human avatar gazing along one out of four  
88 linearly arranged sets of 3 objects each. The objects were selected from two categories, houses and  
89 hands. Hands and houses were distributed such that each category was represented by 1 or 2  
90 exemplars. The observers had to follow the avatar's gaze to a particular object, identified by the  
91 conjunction of the avatar's gaze direction and a verbal instruction that specified the object category  
92 relevant in a given trial (cf. Fig. 1 for an illustration). After an initial baseline period, during which  
93 the avatar looked straight ahead, subjects observed the avatar making a saccade to one of the four  
94 object sets. At the same time, the verbal instruction was delivered. It could either be unambiguous  
95 ("house" vs. "hand", 1/3 of trials each) or remain uninformative ("none", 1/3 of trials). Depending  
96 on the conjunction of gaze direction and instruction three conditions could be distinguished: The  
97 *unambiguous condition* (*ua*; the instruction was informative and there was only one of the verbally  
98 specified objects in the set), the *ambiguous-informative condition* (*inf*; two of the objects were in  
99 the set) and the *ambiguous-uninformative condition* (*uninf*; the verbal instruction was

100 uninformative, i.e. three possible targets). Participants were asked to use the available information  
101 to decide on a target and to communicate their decision by making a saccade to that target 5 s after  
102 the avatar's saccade with the disappearance of the fixation dot serving as go-signal. As their  
103 decision had to consider both gaze direction and the context of the verbal instruction we will refer  
104 to this task as the *contextual gaze following task*.

105 In the localizer task, subjects were able to hit targets reliably and without significant difference  
106 between the two conditions (median hit rates: *gf*:  $0.94 \pm 0.13$  s.d.; *cm*:  $0.92 \pm 0.09$  s.d.;  $p = 0.6$ ,  
107 two-tailed t-test,  $N = 19$ , Fig. 2). Using the gaze following performance in the localizer task as  
108 reference we estimated the following expected hit rates for the contextual gaze following task: 0.94  
109 for the *unambiguous condition*,  $0.94 * 1/2$  for the *ambiguous-informative* and  $0.94 * 1/3$  for the  
110 *ambiguous-uninformative* condition (Fig. 2). As summarized in Fig. 2, the measured performances  
111 matched the estimates in the contextual gaze following task very well (comparison by two-tailed t-  
112 tests, n.s.). This result clearly indicates that the probability to identify an object as a target was  
113 exclusively determined by the information provided by gaze direction and verbal instruction and  
114 not influenced by biases or uncontrolled strategies.

115 ***Task related brain regions.*** To localize the GFP we contrasted *gf* with *cm* trials of the first  
116 experiment. At the group level ( $N = 19$ ) this contrast yielded a patch of significantly larger activity  
117 for *gf* in the pSTS in both hemispheres. The contrast maxima (blue spheres in Fig. 3, upper) were  
118 located at  $x, y, z = -57, -61, -1$  in the left and at  $x, y, z = 48, -67, -1$  in the right hemisphere. These  
119 locations closely match those known from other studies, visualized as green and cyan spheres for  
120 comparison<sup>11,12</sup>. In addition to the GFP, the *gf* > *cm* contrast was significant in a few more regions,  
121 not consistently seen as activated in previous work using the same paradigm (see supplementary  
122 material Tab. 1 for a list of all activated regions). Based on the group coordinates of the GFP we

123 tried to localize it in individual subjects by searching for the closest maximum activation which  
124 passed a statistical significance threshold ( $p < 0.05$ , uncorrected) and a cluster size threshold  
125 (cluster size  $\geq 6$  voxel). Clusters that lay outside of a sphere with a radius of 10 mm centered on  
126 the group maximum were excluded (proximity criterion). Under these constraints, we were able to  
127 determine individual GFPs for nine subjects in the right and for six subjects in the left hemisphere  
128 (white spheres *ibid.*, SD of individual locations: right  $x, y, z = 5, 5, 3$ ; left  $x, y, z = 3, 3, 5$ ).

129 An analogous procedure was applied to localize the hLIP using the contrast  $cm > bl$ , again based  
130 on trials from the first experiment. The location of maximum activation at the group level was  
131 found to be at  $x, y, z = 21, -67, 50$  (right) and  $x, y, z = -21, -67, 53$  (left) (blue spheres *ibid.*) in good  
132 accordance with previous work on saccade related activity in the parietal cortex<sup>13</sup> (Fig. 3, middle).  
133 The generally much stronger contrast allowed us to determine individual contrast hotspots for all  
134 participants when considering the aforementioned secondary criteria described except for the  
135 proximity criterion (white spheres *ibid.*, SD of individual locations: right  $x, y, z = 4, 5, 5$ ; left  $x, y,$   
136  $z = 4, 3, 5$ ). The latter was not considered because of the wide expanse of significant contrast in  
137 parietal cortex.

138 In order to identify brain regions specifically activated when the other's gaze is not sufficient to  
139 unambiguously single out a target object we ran an exploratory whole-brain analysis. Using the  
140 BOLD data from the contextual gaze following experiment, we calculated the BOLD contrast  
141 between trials from both ambiguous conditions vs. the unambiguous condition. This contrast was  
142 significant ( $p \leq 0.001$ , cluster size  $\geq 6$  voxel) for a region in the inferior prefrontal cortex (Fig. 3,  
143 bottom) whose group level maxima were found in slightly different locations in the two  
144 hemispheres, namely at  $x, y, z = -39, 11, 29$  in the left and  $x, y, z = 48, 20, 23$  in the right hemisphere  
145 (blue spheres), corresponding to the most lateral part of left BA 8 and the upper right BA 44. In 15

146 subjects we could delineate individual contrast locations that complied with the criterion of a  
147 significant activation of at least six adjacent voxel at a threshold of  $p = 0.05$  (white spheres *ibid.*,  
148 SD of individual locations: right  $x, y, z = 5, 6, 6$ ; left  $x, y, z = 5, 8, 6$ ). The individual locations  
149 scattered around BA 44, BA 8 and BA 9 and henceforth we will refer to this region as the inferior  
150 frontal junction (IFJ). In the absence of *a priori* expectations based on previous studies we did not  
151 exclude individual locations that did not match the proximity criterion.

152 Weaker, albeit still significant *inf/uninf* > *ua* contrasts were also found in the medial part of left  
153 BA 8 at  $x, y, z = -3, 11, 50$ , bilaterally in BA 6 at  $x, y, z = -21, -4, 50$  and  $x, y, z = 24, -1, 50$  and at  
154  $x, y, z = 36, 8, 47$  (right hemisphere) not far from the IFJ (cf. Supplementary material Tab. 1).  
155 Reversing the contrast, i.e. *ua* > *inf/uninf*, we observed bihemispheric significance within BA 13  
156 (insula), BA 40, within the cingulate cortex (BA 24 and 31) and within BA 7 (all  $p = 0.001$ , and a  
157 minimum of 6 adjacent voxel, cf. Supplementary material Tab. 1). All regions mentioned in the  
158 preceding paragraph, even though lighting up in the contrast at the given significance level, did not  
159 significantly differentiate between conditions in the following examination of the time courses of  
160 the BOLD signals.

161 ***Time course of BOLD signals.*** Successful gaze following in the contextual gaze following task  
162 requires the preceding resolution of the object choice ambiguity. The fact that the IFJ exhibited a  
163 significant influence of ambiguity suggests that it might play a role in resolving it. In this case, the  
164 influence should be apparent well before the onset of gaze following. In order to test this prediction,  
165 we examined the temporal development of BOLD responses associated with the three conditions  
166 (*unambiguous*, *ambiguous-informative*, *ambiguous-uninformative*) in the IFJ and the other major  
167 task-related areas, the GFP and the hLIP. To this end we determined the individual time courses of  
168 the BOLD signal within sphere-shaped ROIs. Whenever the localizer experiment had pinpointed



169 significant individual contrast hot spots, spheres with a radius of 5 mm were centered at the hot  
170 spot coordinates. If this was not the case, instead spheres with a radius of 10 mm, centered at the  
171 group level location of the respective contrast were deployed. Fig. 4 depicts the baseline corrected  
172 time courses of the BOLD signals averaged across participants, separately for the three conditions  
173 and the six ROIs. For all ROIs we found a clear modulation of the BOLD signal by the sequence  
174 of trial events with significant activity also in later phases of a trial, independent of condition, with  
175 one qualification: the signal evoked in *unambiguous* trials in the IFJ was weak at best and confined  
176 to a short period following the presentation of the cue. On the other hand, in the other two  
177 conditions the signal elicited by the cue was not only much stronger but also much more sustained.  
178 As anticipated by the activation maps resulting from experiment 1, the hLIP region showed the  
179 overall strongest BOLD signals while those in the GFP and the IFJ were on a lower level. The time  
180 course of the BOLD signal in the GFP and the hLIP showed structural similarities. An initial drop  
181 after 5 s was followed by two peaks, one after 10 s and another after 15 s (IPS)/16.5 s (GFP). We  
182 assume that the first peak is related to the onset of the cue and the second to the go-signal. The  
183 BOLD signal in the IFJ exhibited a qualitatively different shape: the signal appeared to rise in  
184 response to the cue (clearly only for the two ambiguous conditions) but there was no second peak  
185 in relation to the go-signal. To test for significant differences between conditions we performed a  
186 permutation test at each time point (FDR corrected). This test yielded significant differences  
187 between the *unambiguous* and the *ambiguous-uninformative* condition between 14 s and 17 s in  
188 both hemispheres ( $FDR(p) < 0.05$ ) and in the IFJ between 10.6 s and 17 s (left) and 10.6 s and 15.4  
189 s (right) ( $FDR(p) < 0.05$ ) (gray shaded areas in Fig. 4). In other words, the IFJ differentiates earlier  
190 between ambiguity condition than the IPS. The profiles for *ambiguous-informative* and the  
191 *ambiguous-uninformative* were very close and statistically not different from each other in both the  
192 IFJ and the hLIP region.

193 Also, the other areas mentioned in the preceding section on task-related brain areas exhibited  
194 BOLD signals that showed a modulation by the sequence of task events. Yet, these profiles did not  
195 distinguish between conditions.

## 196 **Discussion**

197 This study confirms our previous finding that the GFP in the pSTS plays a major role in processing  
198 information on the others' gaze in order to establish joint attention. The present work shows that  
199 this role is confined to extracting information on gaze direction. No matter if one or more potential  
200 target objects are hit by the gaze vector, the BOLD activity in the GFP is the same. The need to  
201 differentiate between objects in case more than one is lying on the gaze vector recruits additional  
202 areas that exhibit differential activity. One of these areas, the hLIP in the parietal lobe is also  
203 activated in the more traditional, restricted gaze following paradigms, in which the gaze hits one  
204 object only. hLIP is necessary for the control of spatial attention<sup>14</sup>. Work on monkey area LIP,  
205 arguably homologous to hLIP, has suggested that this area constitutes a priority or saliency map  
206 that attracts the “spotlight” of attention to a highlighted map location. The highlighting may be a  
207 consequence of bottom-up sensory cues, of symbolic cues or of gaze cues<sup>15,16</sup>. The latter is  
208 suggested by single unit recordings from area LIP. Many LIP neurons respond to the appearance  
209 of a gaze cue provided the gazed at location lies within the neuron's receptive field<sup>17</sup>. Spatial  
210 selectivity for gazed at locations and objects at these locations is also exhibited by many neurons  
211 in monkey GFP<sup>18</sup>. However, unlike neurons in LIP, those in the GFP are selective for gaze direction  
212 cueing and do not respond to bottom-up sensory cues highlighting a specific spatial location. This  
213 selectivity suggests that the priority map in LIP might draw on input from the GFP. The yoked  
214 activation of the hLIP/LIP and the GFP in BOLD imaging studies of gaze following is in principle  
215 in accordance with this scenario<sup>11,12,17</sup>. However, the poor temporal resolution of the BOLD signals  
216 does not allow us to critically test if the assumed direction of information flow holds true. In any  
217 case, bidirectional projections are known to connect monkey area LIP and parts of the STS<sup>19</sup>. One  
218 well-established pathway links area LIP and PITd, an area in the lower STS, probably close to the

219 GFP, known to contribute to the maintenance of sustained attention<sup>20,21</sup>. Yet, the anatomical data  
220 available does not allow us to decide if the GFP may indeed be contributing to this fiber bundle.

221 The BOLD signal evoked by gaze following in the hLIP was overall much stronger than in the  
222 GFP. Moreover, unlike the GFP signal, it exhibited a clear dependence on the condition. Higher  
223 activity was associated with the *ambiguous-informative* and the *ambiguous-uninformative*  
224 conditions, both associated with unresolved uncertainty as to the correct object. Why should a  
225 region thought to coordinate spatial shifts of attention show an influence of target ambiguity, i.e.  
226 the need to choose between several potential targets? One possible answer may be that the higher  
227 hLIP activity reflects an increased attentional load. More specifically, increased uncertainty in  
228 ambiguous trials may have prompted more covert shifts of attention from one object to the other in  
229 an attempt to resolve the ambiguity. Although we found no difference in the number of exploratory  
230 saccades after the go signal across conditions, we cannot rule out that participants covertly shifted  
231 attention between targets in ambiguous trials more than in the other trials and that this might have  
232 led to the observed increased activity in the area hLIP. However, a more parsimonious explanation  
233 could be that the hLIP constitutes a neural substrate for making decisions under uncertainty  
234 independent of the attentional load as suggested by several studies such as<sup>22</sup>.

235 A qualitatively similar dependency on condition also characterized BOLD activity in a region we  
236 identified as IFJ based on its location in the frontal lobe at the junction between premotor cortex  
237 (BA 6), BA 44 and BA 8. The condition dependency of the IFJ signal is most probably a  
238 consequence of the need to shift attention between the two object categories, houses and hands.  
239 This interpretation draws on an MEG-fMRI study carried out by Baldauf and Desimone that  
240 demanded the allocation of attention to distinct classes of visual objects such as faces and spatial

241 scenes<sup>23</sup>. Depending on the object of attention, gamma band activity in the IFJ was synchronized  
242 either with the fusiform face area (FFA) or the parahippocampal place area (PPA).

243 Hence, the IFJ seems to play a role in allocating attention between objects or object categories and  
244 shifting between items. Related work on the putative monkey homologue of human IFJ, the ventral  
245 pre-arcuate (VPA), suggests that object representations become highlighted by a match of object  
246 templates in VPA and vision-based object representations in inferotemporal cortex<sup>24</sup>. Arguably,  
247 the need to choose an object in the ambiguous conditions in our experiment requires a deeper  
248 scrutiny of the object options in order to find the match with the object template. This increased  
249 effort may be the cause of the stronger IFJ BOLD signal associated with the ambiguous conditions.  
250 Within this framework, IFJ can be assumed to highlight specific object representations in  
251 inferotemporal cortex. If this was true, information needed by the hLIP to disambiguate the object  
252 choice for gaze following would have to be tapped from inferotemporal cortex rather from the IFJ.

253 In sum, our results suggest a fronto-temporo-parietal network for gaze following and the allocation  
254 of joint attention underlying the disambiguation of object choices if more than one object is met by  
255 the other's gaze vector. Information on the direction of the other's gaze is provided by the GFP,  
256 information that allows the hLIP to highlight the spatial positions of all objects lying on the gaze  
257 vector. Object-based attention, guided by the IFJ, highlights a relevant object category. The  
258 intersection between the two will substantially reduce the possible choices, in most cases singling  
259 out just one object that then will become the target of the observer's gaze following response,  
260 elicited by the hLIP.

261

262

263 **Methods**

264 *Participants*

265 Nineteen healthy, right-handed volunteers (9 females and 10 males, mean age 27.4, s.d. = 3.6)  
266 participated in the study over three sessions. Participants gave written consent to the procedures of  
267 the experiment. The study was approved by the Ethics Review Board of the Tübingen Medical  
268 School and was carried out in accordance with the principles of human research ethics of the  
269 Declaration of Helsinki.

270

271 *Task and procedure*

272 The study was conducted in three sessions across separate days. On day 1, we instructed  
273 participants about the study goals and familiarized them with the experimental paradigms outside  
274 the MRI-scanner by carrying out all relevant parts of the fMRI experiments. The following fMRI-  
275 experiments included a functional localizer paradigm for the scanning session on day 2 as well as  
276 a contextual gaze following paradigm for the scanning session on day 3.

277 Behavioral session. After participants had been familiarized with the tasks, they were head-fixed  
278 using a chinrest and a strap to fix the forehead to the rest. Subjects were facing towards a  
279 frontoparallel screen (resolution = 1280 × 1024 pixels, 60 Hz) (distance to eyes ≈ 600 mm). Eye  
280 tracking data were recorded while participants had to complete 80 trials of the localizer paradigm  
281 and 72 trials of contextual gaze following.

282 Localizer task. We resorted to the same paradigm used in<sup>11</sup>, to localize the gaze following network  
283 and in particular its core, the GFP. In this paradigm, subjects were asked to make saccades to

284 distinct spatial targets based on information provided by a human portrait presented to the observer.  
285 Depending on the instruction, subjects either had to rely on the seen gaze direction to identify the  
286 correct target (*gaze following* condition) or, alternatively, they had to use the color of the irises,  
287 changing from trial to trial but always mapping to one of the targets, in order to make a saccade to  
288 the target having the same color (*color mapping* condition). In other words, the only difference  
289 between the two tasks was the information, subjects had to exploit in order to solve the task, while  
290 the visual stimuli were the same.

291 This task is associated with higher BOLD activity in the GFP, a region, close to the pSTS, when  
292 people perform gaze following compared to color mapping. The task is further associated with the  
293 activation of regions in the intraparietal sulcus (IPS) as well as the frontal cortex that take part in  
294 controlling spatial attention and saccade generation<sup>11,12</sup>. Out of the 19 subjects of our study, 16  
295 performed 6 runs (40 trials per run) and for reasons of time management during image acquisition,  
296 one subject performed 5 runs and two subjects performed 4 runs.

297 Contextual gaze following task. An example of a trial is shown in Fig. 1. Each trial consisted of  
298 the following events in sequence. The trial started by or with the appearance of an avatar (size in  
299 angular deg.) image in the center of the screen together with four arrays of drawn objects (houses  
300 and hands, 3 objects per array). Subjects were asked to fixate on a red fixation dot (diameter)  
301 between the portrait's eyes. After 5 seconds of baseline fixation, the portrait's gaze shifted towards  
302 one specific target object. Simultaneously, an auditory contextual instruction either specified the  
303 object class of the target (spoken words "hand" or "house") or was not informative ("none"). While  
304 maintaining fixation, subjects needed to judge which object the target was (i.e. on which object the  
305 face was most likely looking at). After 5 seconds delay, the fixation dot vanished, an event that  
306 served as a go signal. Participants had 2 seconds to make a saccade to the chosen target object and

307 fixate it until a subsequent blank fixation screen was presented for 8 seconds. The subjects were  
308 instructed to perform the task as accurate as possible. They were specifically instructed, when  
309 unsure about the actual target, they should still rely on gaze and contextual information and choose  
310 the target they believed the avatar to be looking at.

311

## 312 *Stimuli*

313 Control of visual and auditory stimuli as well as data collection was controlled by the Linux based  
314 open source system *nrec* (<https://nrec.neurologie.uni-Tuebingen.de/>). The stimuli in the localizer  
315 task were identical to the stimuli used in a previous study<sup>11</sup>. The stimuli of the contextual gaze  
316 following task consisted of an avatar and in total 12 target objects belonging to different types  
317 (houses and hands). The avatar was generated with the custom-made OpenGL library *Virtual Gaze*  
318 *Studio*<sup>25,26</sup> which offers a controlled virtual 3D-environment in which an avatar can be set to  
319 precisely gaze at specific objects. More specifically, the program allows to place objects on a circle,  
320 parallel to the coronal axis, anterior to the avatar face. For each stimulus, we placed 12 objects in  
321 the surroundings of the avatar. The location of individual objects was fully determined by the  
322 distance to the coronal plane at the level of the avatar's nasion, the radius of the circle and the angle  
323 of the object on that circle. By keeping the angle on the circle constant for sets of three objects, we  
324 created four arrays at angles 120°, 150°, 210° and 240°. The individual locations of these objects  
325 were specified by varying the distance and the circle radii based on trigonometric calculations. For  
326 these calculations we assumed a right triangle from the avatar's nasion with the hypotenuse  
327 pointing towards the object, an adjacent leg (length corresponded to the distance of the circle)  
328 proceeding orthogonal to the coronal plane, and an opposite leg which corresponded to the radius.  
329 By keeping  $\tan\alpha$  fixed to 0.268, we varied the distances and circle radii. For the 120° and 240°



330 arrays, the circle radii were 335, 480, 580 and the distances were 90, 129 and 151 virtual mm. For  
331 the 150° and 210° arrays, the radii were 380, 510 and 590 and the distances were 102, 137 and 158  
332 virtual mm. The reason for the difference of radii and distances between 120°/240° and 150°/210°  
333 arrays was that this allowed to exploit the total width of the screen. This procedure guaranteed that  
334 the angle of the gaze vector to all objects on an array was almost identical. This makes it relevant  
335 to take contextual information into account in order to choose the true target.

336 The objects were drawings of the two categories houses and hands, downloaded from freely  
337 available online sources (<http://www.allvectors.com/house-vector/>, [https://www.freepik.com/free-  
338 vector/hand-drawn-hands\\_812824.htm#term=hands&page=1&%20position=37](https://www.freepik.com/free-vector/hand-drawn-hands_812824.htm#term=hands&page=1&%20position=37)). The target objects  
339 were arranged in four radial directions (three objects in each direction) with the avatar eyes as the  
340 origin; in other words, the avatar's gaze always hit one out of three objects along the gaze vector  
341 though participants were not able to tell which of the three it was. On each array, either 2 hands  
342 and one house or one hand and two houses were present. Further, we fixed the number of hands  
343 and houses per hemifield to three. The relative order of the objects was pseudo-randomized from  
344 trial to trial.

345 During a trial the participant observed the avatar making a saccade in one of the four directions  
346 while simultaneously hearing a verbal instruction providing the additional information by either  
347 specifying the target type ("house" or "hand") or being uninformative in that respect ("none") (cf.  
348 Fig. 1 for an illustration). In connection with the set of targets specified by the gaze cue the verbal  
349 instruction created different levels of ambiguity: *unambiguous* (only one of the verbally specified  
350 types was in the set), *ambiguous-informative* (two of the types were in the set) and *ambiguous-  
351 uninformative* (verbal instruction was uninformative, i.e. three possible targets). We created a pool  
352 stimulus sets which satisfied three constraints: There was an equal number of trials in which a) the

353 targets were hands or houses, b) targets were presented with an *unambiguous*, *ambiguous-*  
354 *informative* and *ambiguous-uninformative* instruction, and c) the spatial position (one out of twelve  
355 potential positions) of targets was matched. This led to  $2 \times 3 \times 12 = 72$  stimuli sets. We exposed  
356 every subject to 180 trials in which each stimulus set was shown twice and for the residual 36 trials,  
357 stimuli were drawn from pseudo-randomly from the stimulus pool so that the three criteria above  
358 were met.

359 Auditory stimulation was delivered via headphones (Sennheiser HD 201, Wedemark-Wennebostel,  
360 Germany, during the behavioral session and the standard air pressure headphones of the scanner  
361 system during the MRI sessions). The auditory instructions “hand”, “house” and “none” were  
362 computer generated with the web application imTranslator ([http://imtranslator.net/translate-and-](http://imtranslator.net/translate-and-speak/speak/english/)  
363 [speak/speak/english/](http://imtranslator.net/translate-and-speak/speak/english/)) and processed with the software Audacity 2.1.2. The sound files had a  
364 duration of 600 ms.

365

### 366 *Eye tracking*

367 During all three sessions, we recorded eye movements of the right eyes using commercial eye  
368 tracking systems (Behavioral sessions: Chronos Vision C-ETD, Berlin, Germany, sampling rate  
369 400 Hz, resolution  $< 1^\circ$  visual angle; Scanning sessions: SMI iView X MRI-LR, Berlin, Germany,  
370 sampling rate = 50 Hz, resolution  $\approx 1^\circ$  visual angle).

371 Eye tracking data was processed as follows. First, we normalized the raw eye tracking signal by  
372 dividing it by the average of the time series. Eye blinks were removed using a velocity threshold  
373 ( $> 1000^\circ/\text{s}$  visual angle). Next, we focused on a time window in which we expected the saccades  
374 to the target objects to occur ([go-signal – 500 ms, go-signal + 1800 ms]). Within this time window,

375 we detected saccades by identifying the time point of maximum eye movement velocity. Pre- and  
376 post-saccadic fixation positions were determined by averaging periods of 200 ms before and after  
377 the saccade occurred. Due to partly extensive measurement noise of the eye tracking system, we  
378 did not automatize the categorization of the final gaze position. Instead, we plotted X- and Y  
379 coordinates of the post-saccadic eye position for every run. An investigator (MG), who was blind  
380 to the true gaze target-directions of the stimulus face, manually validated, which trials yielded  
381 positions that were clearly assignable to one object location. For the behavioral analysis we only  
382 used the valid trials (mean number of valid trials per participant = 80.2, s.d. = 45.4, range = [0, 153])  
383 and weighted the individual performance values by its number in order to compute weighted means  
384 and SDs. Note, that we used these valid trials only for the behavioral analysis but used all trials of  
385 the participants for the fMRI analysis, assuming that eye tracking measurement noise was  
386 independent of the performance of the subjects.

387

### 388 *fMRI acquisition and preprocessing.*

389 We acquired MR images using a 3T scanner (Siemens Magnetom Prisma, Erlangen, Germany)  
390 with a 20-channel phased array head coil at the Department of Biomedical Magnetic Resonance of  
391 the University of Tübingen. The head of the subjects was fixed to the head coil by using plastic  
392 foam cushions to avoid head movements. An AutoAlign sequence was used to standardize the  
393 alignment of images across sessions and subjects. A high-resolution T1-weighted anatomical scan  
394 (MP-RAGE,  $176 \times 256 \times 256$  voxel, voxel size  $1 \times 1 \times 1$  mm) and local field maps were  
395 acquired. Functional scans were carried out using a T2\*-weighted echo-planar multi-banded 2D  
396 sequence (multi-band factor = 2, TE = 35 ms, TR = 1500 ms, flip angle =  $70^\circ$ ) which covered the  
397 whole brain ( $44 \times 64 \times 64$  voxel, voxel size  $3 \times 3 \times 3$  mm, interleaved slice acquisition, no gap).

398 For image preprocessing we used the MATLAB SPM12 toolbox (Statistical Parametric Mapping,  
399 <https://www.fil.ion.ucl.ac.uk/spm/>). The anatomical images were segmented and realigned to the  
400 SPM T1 template in MNI space. The functional images were realigned to the first image of each  
401 respective run, slice-time corrected, coregistered to the anatomical image. Structural and functional  
402 images were spatially normalized to MNI space. Finally, functional images were spatially  
403 smoothed with a Gaussian kernel (6 mm full-width at half maximum).

404

#### 405 *fMRI analysis.*

406 We estimated a generalized linear model (GLM) to identify ROIs of single subjects. On these  
407 regions, we performed time course analyses to investigate event-related BOLD signal changes. In  
408 a first-level analysis, we constructed GLMs for the localizer task ( $GLM_{loc}$ ) and the contextual gaze  
409 following task ( $GLM_{cgf}$ ). The  $GLM_{loc}$  included predictors at the onsets of directional cues and of  
410 the baseline fixation phase. The  $GLM_{cgf}$  had predictors at the onset of the contextual instruction.  
411 These event specific predictors of both GLMs used the canonical hemodynamic response function  
412 of SPM to model the data. We corrected for head motion artifacts by the estimation of six  
413 movement parameters with the data of the realignment preprocessing step. Low-frequency drifts  
414 were filtered using a high-pass filter (cutoff at 1/128 Hz).

415

#### 416 *GFP and hLIP localizer*

417 Before collecting the data, we specified the expected locations of two brain areas, hLIP and GFP  
418 from fMRI literature. We resorted to the hLIP coordinates of the human homologue of monkey  
419 area LIP which had been identified in humans who performed a delayed saccade task<sup>13</sup>. We

420 transformed the coordinates into MNI space, using an online transformation method of Lacadie  
421 and colleagues<sup>27</sup> (<http://sprout022.sprout.yale.edu/mni2tal/mni2tal.html>). ROIs were defined as the  
422 voxel of highest signal contrast (GLM<sub>loc</sub>: directional cue vs. baseline fixation) the cluster of  
423 significant activity (cluster size  $\geq 6$ ,  $p < 0.05$ ) which minimized the spatial distance to the standard  
424 coordinates. This contrast has been associated with shifts of attention in response to gaze cues  
425 (Marquardt, Ramezanzpour et al. 2017). We identified the hLIP regions bilaterally in all 19 subjects  
426 with a mean distance of 13.4 mm (s.d. = 3.9 mm) between IPS<sub>right</sub> and the standard coordinates and  
427 11.93 mm (s.d. = 3.7 mm) for IPS<sub>left</sub>. At the location of the ROI, a sphere (radius = 5 mm) was  
428 placed.

429 We used a similar procedure for the GFP but with different expected coordinates, a different  
430 contrast of the (GLM<sub>loc</sub> gaze following vs. color mapping) and the additional constraint that the  
431 cluster of significant activity had to be at least partially located within 10 mm distance around the  
432 pSTS standard coordinates. This contrast has been associated to the calculation of the gaze vector  
433 direction (for more details see Marquardt et al., 2017). We localized pSTS<sub>right</sub> in nine individual  
434 subjects (mean distance = 6.6 mm, s.d. = 3.1 mm) and pSTS<sub>left</sub> in six subjects (mean distance = 7.7  
435 mm; s.d. = 1.4 mm). For those subjects and hemispheres where we did not identify pSTS, we  
436 reasoned that signal contrast was not high enough and therefore placed a sphere (radius 10 mm) at  
437 the coordinates obtained from a second level analysis.

438

### 439 *Contextual gaze following analysis*

440 We performed an exploratory whole-brain analysis on the data from the contextual gaze following  
441 task. We contrasted ambiguous conditions with the unambiguous condition at the group level

442 (significance threshold  $p < 0.001$ , cluster size  $\geq 6$  voxel) as well as at the single subject level  
443 (significance threshold  $p < .05$ , cluster size  $\geq 6$  voxel). For the single subject analysis, we searched  
444 for ROIs that minimized the distance to the group level coordinates. At the identified individual  
445 locations (15 subjects) we placed spheres of 5 mm radius. Again, we used 10 mm spheres at the  
446 group level coordinates for those four subjects for whom we had not identified the ROI in the first  
447 level analysis.

448 For every ROI, the mean raw time series of the BOLD signal was extracted using the MATLAB  
449 toolbox *marsbar* 0.44 (<http://marsbar.sourceforge.net>). The time course of every trial was  
450 normalized by the average signal intensity 5 s before the contextual instruction onset and  
451 transformed into % of signal change. For each participant, we averaged time courses across trials  
452 and used the time courses of the three contextual conditions and six ROIs for our analysis. To test  
453 differences across conditions for statistical significance, we performed permutation tests at each  
454 time point after contextual instruction delivery. To do so we pooled the data of two experimental  
455 conditions, respectively, and produced 10,000 random splits for each pool. By computing the  
456 differences between the means of these splits, we obtained a distribution of differences under the  
457 null hypothesis. Calculating the fraction of values more extreme than the actual difference between  
458 means allowed us to obtain a  $p$ -value for each time bin. To account for the multiple comparison  
459 problem, we transformed  $p$ -values to FDR corrected  $q$ -values<sup>28</sup> and considered each time bin with  
460  $q < .05$  as statistically significant.

461

462

463 ***Acknowledgments:*** We are grateful to Friedemann Bunjes and Michael Erb for technical support.

464 This work was made possible by a grant from the Deutsche Forschungsgemeinschaft (TH 425/12-  
465 2).

466  
467 ***Authors Contributions:*** PT developed the conceptual framework of the research. PT, PK and HR  
468 designed the experiments. PK and PWD performed the experiments. PK and MG analyzed the data.  
469 All authors contributed to the interpretation of results and the writing.

470

471 ***Competing Interests statement***

472 All authors declare to have no competing interests of any sort.

473

474

475

476

477

478

479

480

481

## 482 **References**

- 483 1. Baron-Cohen, S. How to build a baby that can read minds: Cognitive mechanisms in mind reading.  
484 *Curr. Psychol. Cogn.* **13**, 513–552 (1994).
- 485 2. Baron-Cohen, S. *Mindblindness: An essay on autism and theory of mind.* (The MIT Press, 1995).
- 486 3. Atabaki, A., Marciniak, K., Dicke, P. W. & Thier, P. Assessing the precision of gaze following using a  
487 stereoscopic 3D virtual reality setting. *Vision Res.* **112**, 68–82 (2015).
- 488 4. Butterworth, G. & Jarrett, N. What minds have in common is space: Spatial mechanisms serving joint  
489 visual attention in infancy. *British journal of developmental psychology* **9**, 55–72 (1991).
- 490 5. Bock, S. W., Dicke, P. W. & Thier, P. How precise is gaze following in humans? *Vision Res.* **48**, 946–  
491 957 (2008).
- 492 6. Kobayashi, H. & Kohshima, S. Unique morphology of the human eye. *Nature* **387**, 767–768 (1997).
- 493 7. Liuzza, M. T. *et al.* Follow My Eyes: The Gaze of Politicians Reflexively Captures the Gaze of Ingroup  
494 Voters. *PLOS ONE* **6**, e25117 (2011).
- 495 8. Teufel, C., Alexis, D. M., Clayton, N. S. & Davis, G. Mental-state attribution drives rapid, reflexive gaze  
496 following. *Atten. Percept. Psychophys.* **72**, 695–705 (2010).
- 497 9. Teufel, C. *et al.* Social Cognition Modulates the Sensory Coding of Observed Gaze Direction. *Curr.*  
498 *Biol.* **19**, 1274–1277 (2009).
- 499 10. Laube, I., Kamphuis, S., Dicke, P. W. & Thier, P. Cortical processing of head- and eye-gaze cues  
500 guiding joint social attention. *Neuroimage* **54**, 1643–1653 (2011).
- 501 11. Marquardt, K., Ramezanzpour, H., Dicke, P. W. & Thier, P. Following Eye Gaze Activates a Patch in the  
502 Posterior Temporal Cortex That Is Not Part of the Human ‘Face Patch’ System. *eNeuro* **4**, 1–10  
503 (2017).



- 504 12. Materna, S. *et al.* Dissociable Roles of the Superior Temporal Sulcus and the Intraparietal Sulcus in  
505 Joint Attention: A Functional Magnetic Resonance Imaging Study. *J. Cogn. Neurosci.* **20**, 108–119  
506 (2008).
- 507 13. Sereno, M. I., Pitzalis, S. & Martinez, A. Mapping of Contralateral Space in Retinotopic Coordinates  
508 by a Parietal Cortical Area in Humans. *Science* **294**, 1350–1354 (2001).
- 509 14. Corbetta, M. & Shulman, G. L. Control of goal-directed and stimulus-driven attention in the brain.  
510 *Nature Reviews Neuroscience* **3**, 201–215 (2002).
- 511 15. Bisley, J. W. & Goldberg, M. E. Attention, Intention, and Priority in the Parietal Lobe. *Annual Review*  
512 *of Neuroscience* **33**, 1–21 (2010).
- 513 16. Walther, D. & Koch, C. Modeling attention to salient proto-objects. *Neural Networks* **19**, 1395–1407  
514 (2006).
- 515 17. Shepherd, S. V., Klein, J. T., Deaner, R. O., Platt, M. L. & Shepard, R. N. Mirroring of attention by  
516 neurons in macaque parietal cortex. *Proc. Natl. Acad. Sci.* **106**, 9489–9494 (2009).
- 517 18. Ramezanpour, H., Marciniak, K., Dicke, P. W. & Thier, P. Neurons in the posterior STS extract facial  
518 information for the guidance of gaze following and the establishment of joint attention. (2014).
- 519 19. Seltzer, B. & Pandya, D. N. Parietal, temporal, and occipital projections to cortex of the superior  
520 temporal sulcus in the rhesus monkey: A retrograde tracer study. *J. Comp. Neurol.* **343**, 445–463  
521 (1994).
- 522 20. Sani, I., McPherson, B. C., Stemmann, H., Pestilli, F. & Freiwald, W. A. Functionally defined white  
523 matter of the macaque monkey brain reveals a dorso-ventral attention network. *eLife* **8**, e40520  
524 (2019).
- 525 21. Stemmann, H. & Freiwald, W. A. Attentive Motion Discrimination Recruits an Area in Inferotemporal  
526 Cortex. *J. Neurosci.* **36**, 11918–11928 (2016).

- 527 22. Vickery, T. J. & Jiang, Y. V. Inferior Parietal Lobule Supports Decision Making under Uncertainty in  
528 Humans. *Cereb Cortex* **19**, 916–925 (2009).
- 529 23. Baldauf, D. & Desimone, R. Neural Mechanisms of Object-Based Attention. *Science* **344**, 424–427  
530 (2014).
- 531 24. Bichot, N. P., Heard, M. T., DeGennaro, E. M. & Desimone, R. A source for feature based attention in  
532 the prefrontal cortex. *Neuron* **88**, 832–844 (2015).
- 533 25. Benz, P. F. Erstellung einer Software zur partiellen Virtualisierung von Experimentierumgebungen für  
534 die perzeptionelle Blickrichtungsbestimmung. (Eberhard Karls Universität, 2008).
- 535 26. Hübner, C. V. B. Erstellung einer Software zum Design virtueller Experimentumgebungen:  
536 Bestimmung des Referenzsystems der visuellen Verarbeitung artifizieller Blicke. (Eberhard Karls  
537 Universität, 2008).
- 538 27. Lacadie, C. M., Fulbright, R. K., Rajeevan, N., Constable, R. T. & Papademetris, X. More accurate  
539 Talairach coordinates for neuroimaging using non-linear registration. *NeuroImage* **42**, 717–725  
540 (2008).
- 541 28. Benjamini, Y. & Hochberg, Y. Controlling the False Discovery Rate: A Practical and Powerful Approach  
542 to Multiple Testing. *Journal of the Royal Statistical Society. Series B (Methodological)* **57**, 289–300  
543 (1995).
- 544
- 545
- 546
- 547
- 548

549 **Figures**

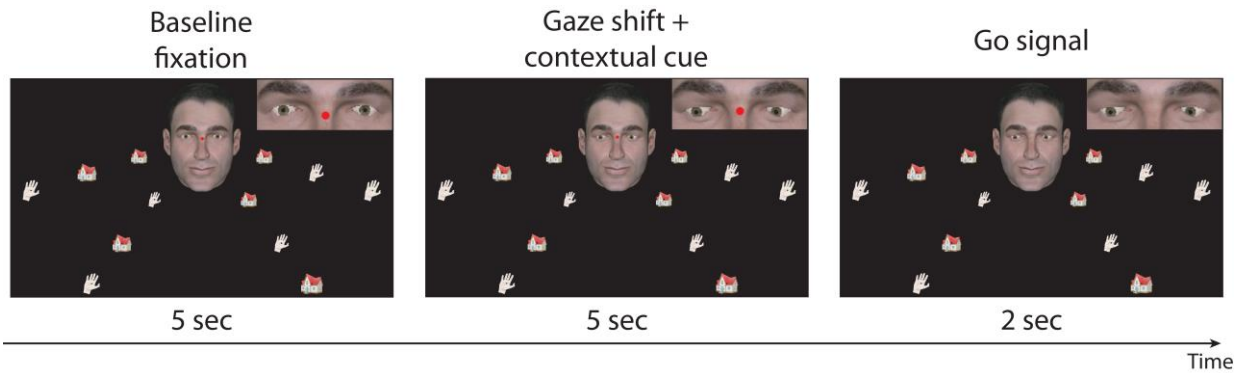

550

551 **Fig. 1. Contextual gaze following task.** An avatar appeared in the center of the screen together  
552 with four linearly arranged sets of objects (houses and hands). After a baseline fixation period,  
553 the portrait's gaze shifted towards one specific target object simultaneously with an auditory  
554 contextual instruction specifying the object class of the target (hand or house) or not, i.e.  
555 remaining uninformative ("none"). While maintaining fixation, subjects needed to decide on the  
556 target and make a saccade to the chosen target after a go-signal indicated by the disappearance  
557 of the fixation dot.

558

559

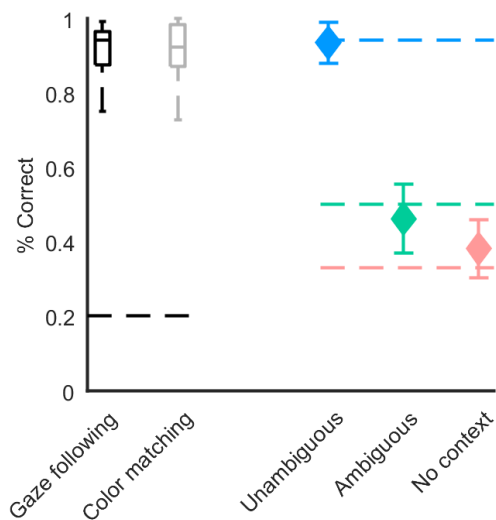

560

561 **Fig. 2. Behavioral performance.** Left: Boxplots (black and gray) showing the percentage of  
562 correct response in the localizer paradigm (dashed line depicts chance level performance).

563 Right: Plots of correct responses in the contextual gaze following paradigm (weighted mean  
564 performance and weighted std, dashed lines depict expected performance).

565

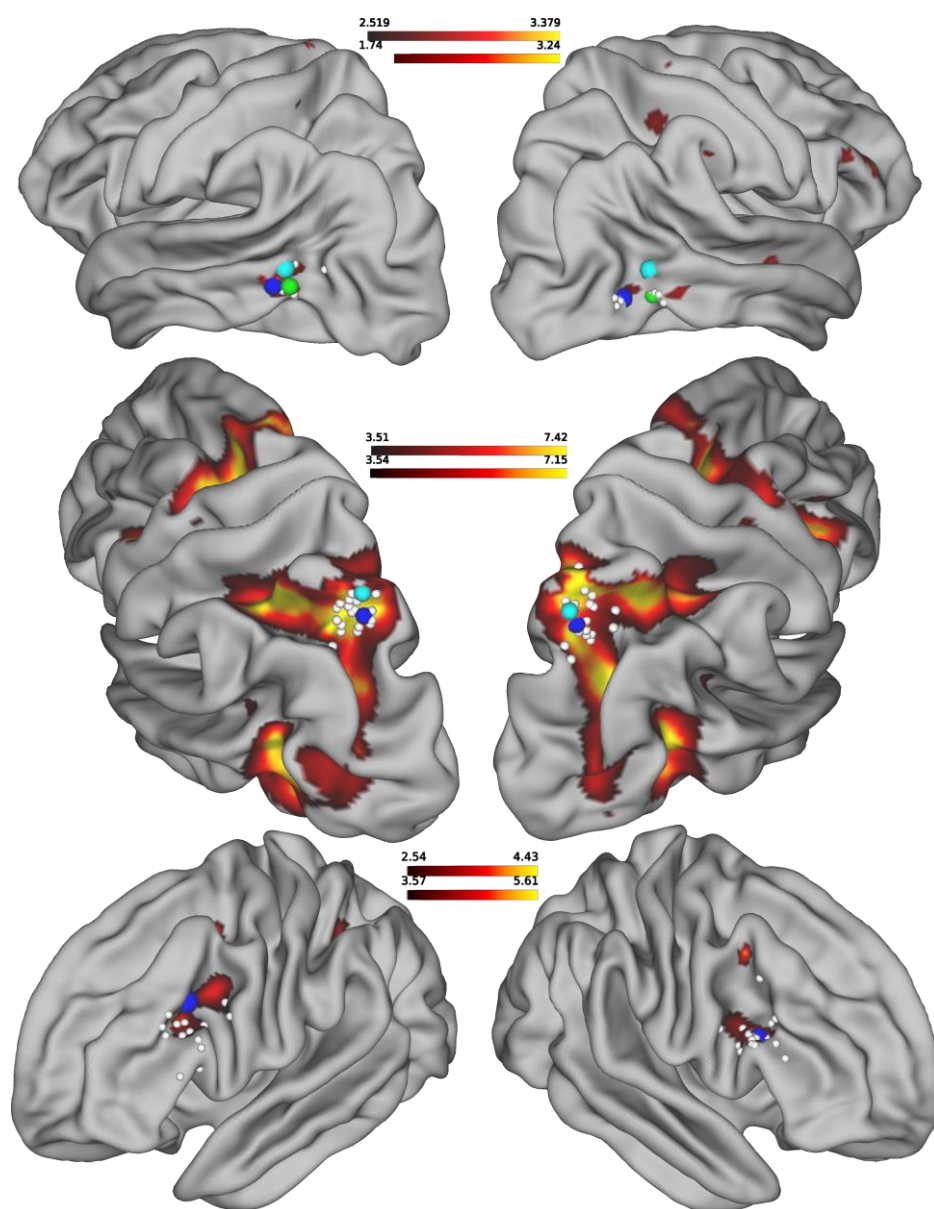

566

567 **Fig. 3. Activation maps.** Blue dots mark maximum activation on the group level closest to  
568 locations taken from literature (green<sup>11</sup> and cyan<sup>12</sup> dots), white dots mark the maximum  
569 activation of those locations which were identifiable on the individual level. Upper row: contrast  
570  $gf > cm$  (localizer paradigm) used to identify the GFP; Middle row: contrast  $cm > bl$  (localizer  
571 paradigm) used to identify saccade-related activity in the hLIP closest to location taken from<sup>13</sup>  
572 (cyan dot); Bottom row:  $uninf > ua$  (contextual gaze following paradigm).

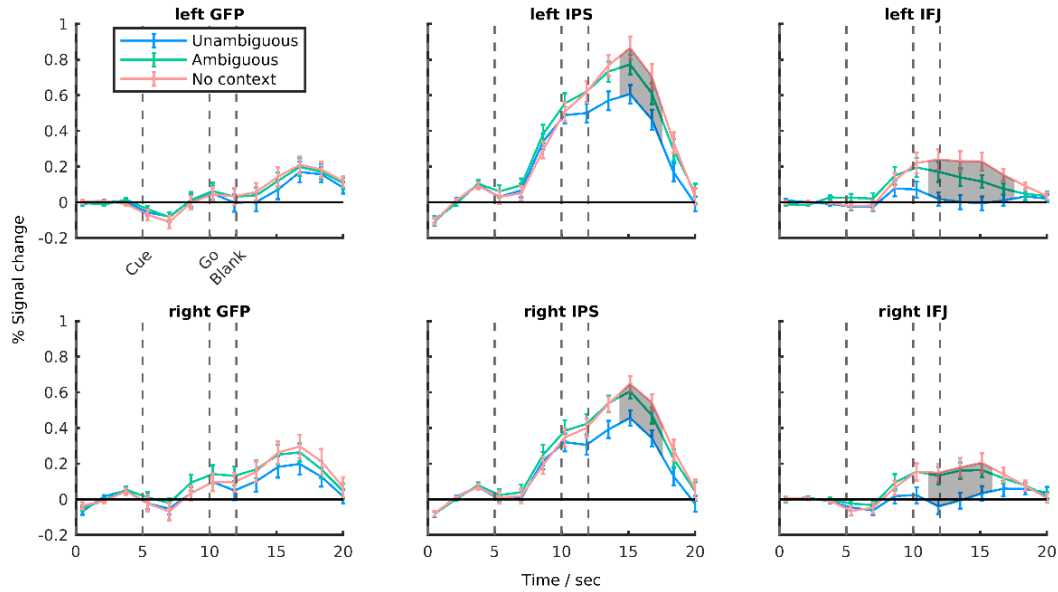

573

574 **Fig. 4. Time courses of activation.** Time course of mean percent signal change (error bars are  
575 SEM). Areas in which conditions showed significant differences are shaded (permutations test,  
576  $FDR(p) < 0.05$ ).

577

578

579

580

581

582

583

584

585 **Supplement**

586 *Localizer experiment*

587 As a localizer task we used a cued saccade task, also denoted as a *gaze following vs. color mapping*  
588 task<sup>11</sup>. During a baseline fixation phase, subjects had to fixate on a red dot between the eyes of a  
589 photography of a face gazing straight ahead. Below the stimulus face, five colored and horizontally  
590 arranged rectangles were presented as gaze targets. After five seconds of baseline fixation, the  
591 portrait's eye-gaze shifted towards one of the targets and, simultaneously, its eye color (i.e. the  
592 color of the irises) changed to match the color of one of the rectangles. After one second, the red  
593 dot disappeared (go signal) and the subjects had to shift their own gaze towards to the correct target  
594 and fixate it. There were two different experimental conditions: (1) in *gaze following* trials, the  
595 correct target was determined by the eye-gaze direction of the stimulus face, (2) in *color mapping*  
596 trials, the correct target had the same color as the stimulus irises. The task was performed in several  
597 runs, each consisting of four blocks (2 gaze following, 2 color mapping). Each block started with  
598 the task instruction as a seven seconds lasting window containing the written words “gaze  
599 following” or “color mapping”, followed by 10 corresponding trials. Task instruction alternated  
600 between blocks. Target objects were counter-balanced such that each rectangle was the target  
601 object twice during a block and target order was pseudorandomized.

602

603

604

605

606 *Table 1*

| <b>Corresponding Area</b>        | <b>Contrast</b>    | <b>x</b> | <b>y</b> | <b>z</b> | <b>Threshold</b> |
|----------------------------------|--------------------|----------|----------|----------|------------------|
| Left-Fusiform (GFP)              | <i>gf&gt;cm</i>    | -57      | -61      | -1       | 0.01, 6 Voxel    |
| Right-Fusiform (GFP)             |                    | 48       | -67      | -1       |                  |
| Outside defined BAs (Colliculus) |                    | -6       | -34      | -16      |                  |
| Outside defined BAs (Colliculus) |                    | 9        | -34      | -16      |                  |
| Right BA45                       |                    | 45       | 32       | 8        |                  |
| Left BA8 (IFJ)                   | <i>uninf&gt;ua</i> | -39      | 11       | 29       | 0.001, 6 Voxel   |
| Right BA44 (IFJ)                 |                    | 48       | 20       | 23       |                  |
| Medial BA8                       |                    | -3       | 11       | 50       |                  |
| Left BA6                         |                    | -21      | -4       | 50       |                  |
| Right BA6                        |                    | 24       | -1       | 50       |                  |
| Outside defined BAs              |                    | 36       | 8        | 47       |                  |
| Left Insula                      | <i>ua&gt;uninf</i> | -36      | -16      | 5        | 0.001, 6 Voxel   |
| Right Insula                     |                    | 42       | -19      | -1       |                  |
| Left BA40                        |                    | -63      | -28      | 20       |                  |
| Right BA40                       |                    | 51       | -31      | 17       |                  |
| Left BA24 (Cingulate cortex)     |                    | -9       | -34      | 44       |                  |
| Right BA 31 (Cingulate cortex)   |                    | 9        | -16      | 41       |                  |
| BA7                              |                    | -24      | -43      | 65       |                  |
| BA7                              |                    | 12       | -46      | 65       |                  |

607 Assignments based on <http://sprout022.sprout.yale.edu/mni2tal/mni2tal.html>

608
